# Supplementary material for: High thermoelectric performance of In-doped Cu2SnSe3 prepared by fast combustion synthesis
Source: Royal Society of Chemistry journal article supplement (doi:10.1039/c5nj03345d), 2016-01-01
Supplement: c5nj03345d1.pdf [file c5nj03345d1.pdf]

**Submitted to New Journal of Chemistry**

## **Electronic Supplementary Information**

### **High thermoelectric performance of In-doped Cu<sub>2</sub>SnSe<sub>3</sub> prepared by fast combustion synthesis**

Yuyang Li,<sup>a</sup> Guanghua Liu,<sup>a,\*</sup> Jiangtao Li,<sup>a,\*</sup> Kexin Chen,<sup>b</sup> Yemao Han,<sup>a</sup> Min Zhou,<sup>a</sup> Laifeng Li,<sup>a</sup> Mingjun Xia,<sup>a</sup> Xingxing Jiang,<sup>a</sup> Zheshuai Lin<sup>a</sup>

*a. Key Laboratory of Cryogenics, Technical Institute of Physics and Chemistry, Chinese Academy of Sciences, Beijing 100190, P. R. China.*

*b. State Key Laboratory of New Ceramics & Fine Processing, School of Materials Science and Engineering, Tsinghua University, Beijing 100084, P. R. China.*

Corresponding authors:

Guanghua Liu, E-mail: [liugh02@163.com](mailto:liugh02@163.com)

Jiangtao Li, E-mail: [ljiangtao@mail.ipc.ac.cn](mailto:ljiangtao@mail.ipc.ac.cn)

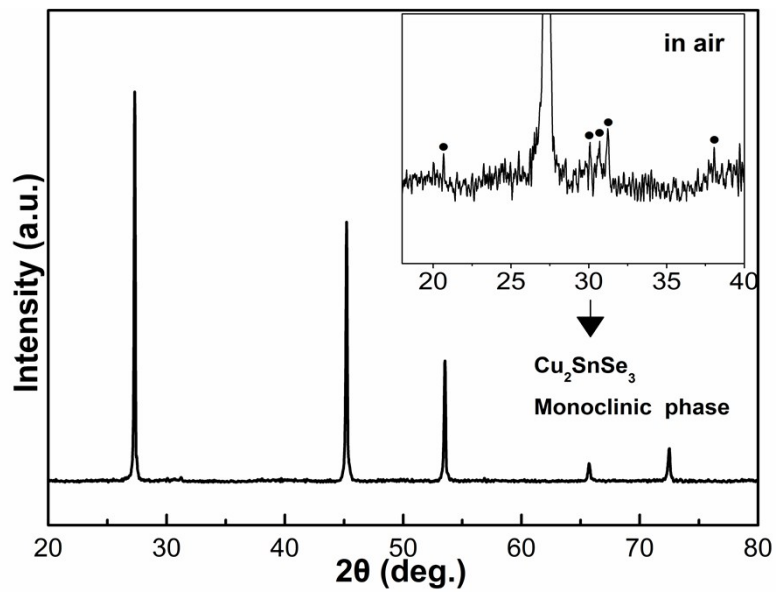

**Fig.S1** XRD pattern of the monoclinic  $\text{Cu}_2\text{SnSe}_3$  prepared by combustion synthesis in air.

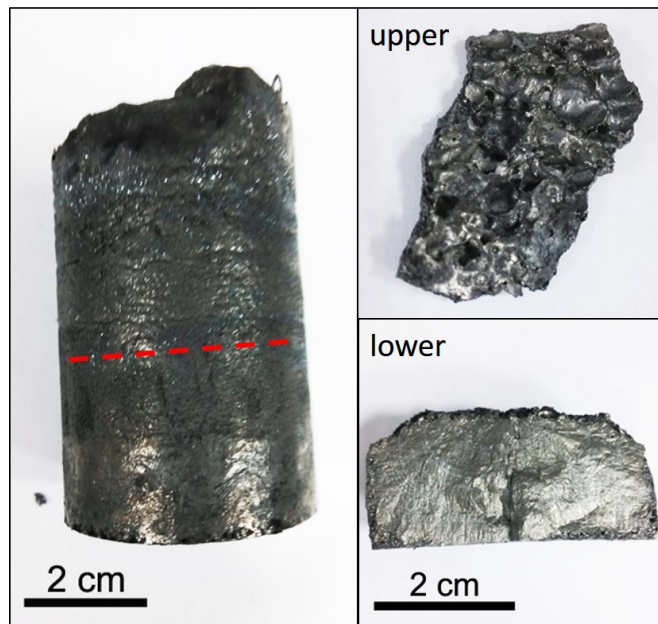

**Fig. S2** Photographs of the  $\text{Cu}_2\text{Sn}_{0.9}\text{In}_{0.1}\text{Se}_3$  sample prepared by high-pressure combustion synthesis in an Ar atmosphere with a pressure of 2 MPa.

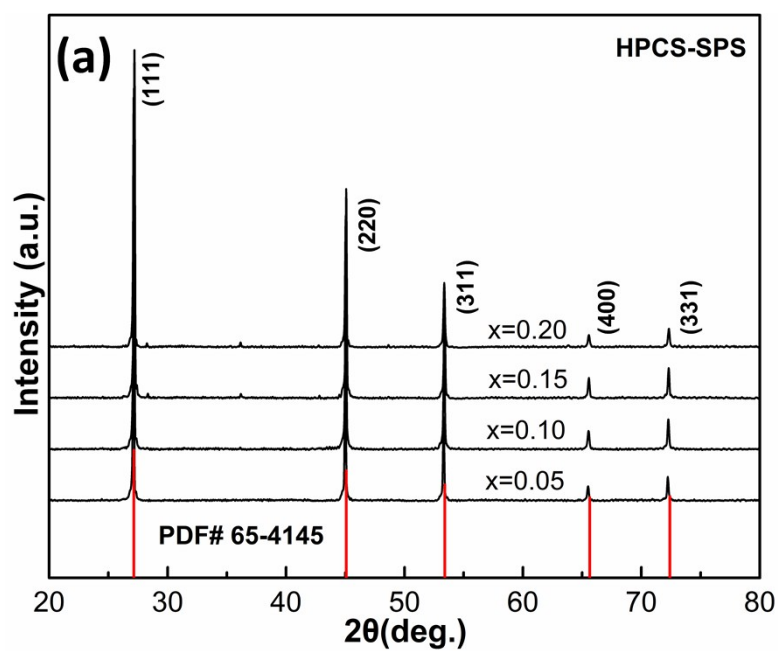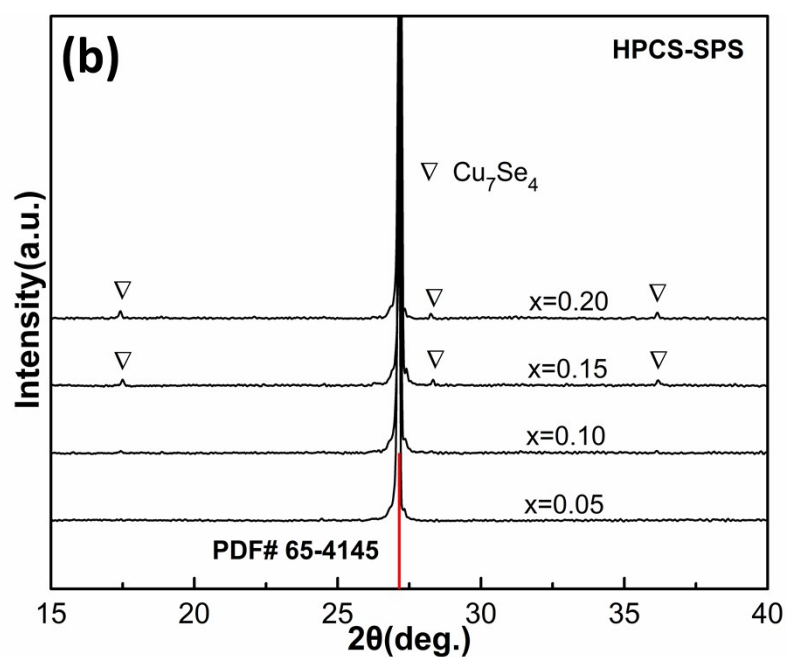

**Fig.S3** XRD patterns of the  $\text{Cu}_2\text{Sn}_{1-x}\text{In}_x\text{Se}_3$  samples after spark plasma sintering: (a) an overview; (b) an enlarged view to clearly show the small peaks. No significant difference was observed in the XRD patterns of the samples just synthesized and after spark plasma sintering.

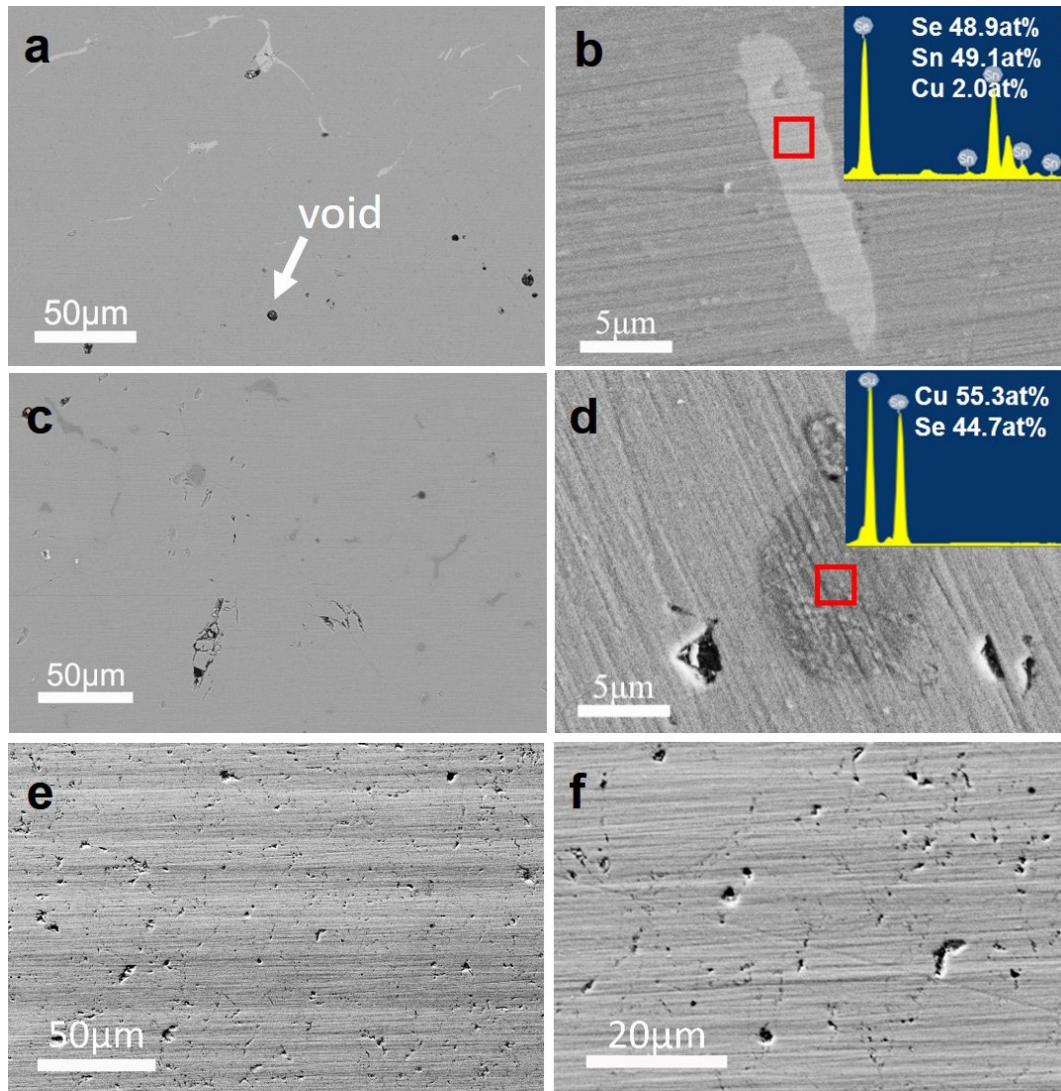

**Fig.S4** Back-scattered electron images and EDS results of the  $\text{Cu}_2\text{Sn}_{1-x}\text{In}_x\text{Se}_3$  samples: (a) and (b) prepared by high-pressure combustion synthesis,  $x=0.05$ , with SnSe as the secondary phase; (c) and (d) prepared by high-pressure combustion synthesis,  $x=0.20$ , with a Cu-rich secondary phase; (e) and (f) prepared by high-pressure combustion synthesis followed with spark plasma sintering,  $x=0.1$ , with much more grain boundaries compared with the just synthesized samples before spark plasma sintering.

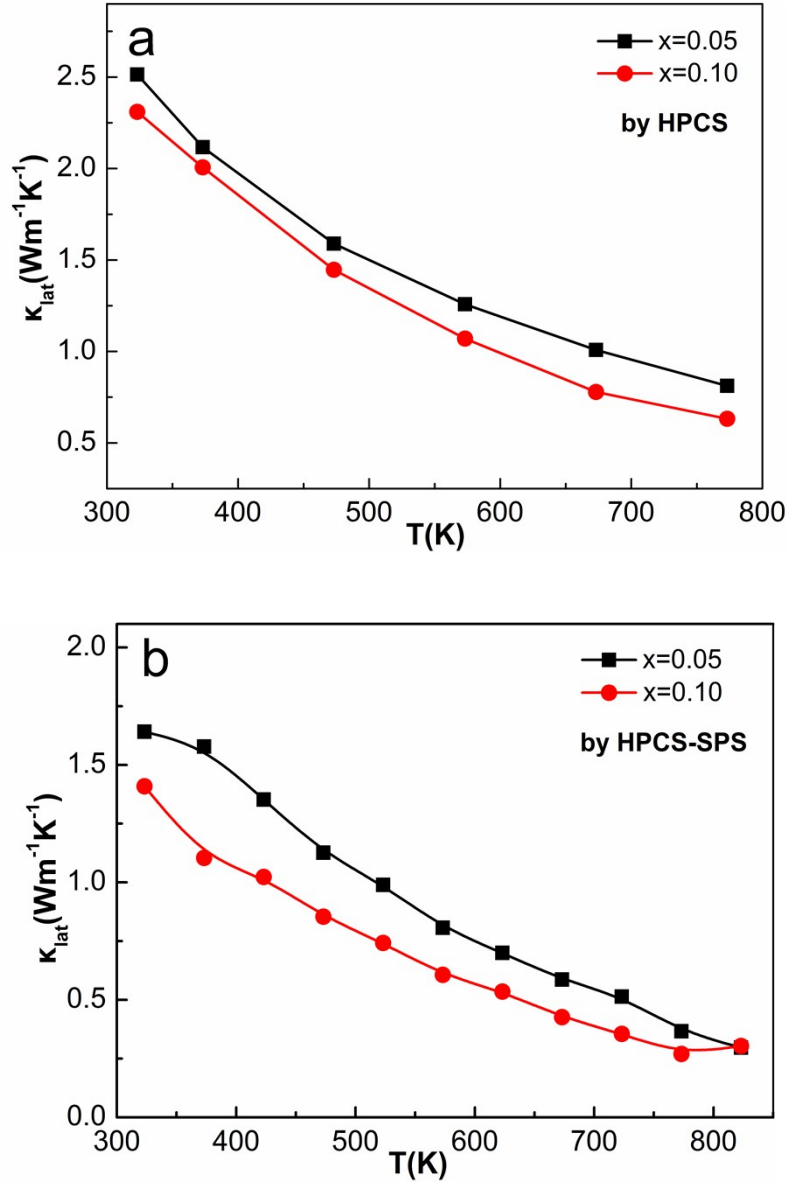

**Fig.S5** Lattice thermal conductivities of  $\text{Cu}_2\text{Sn}_{1-x}\text{In}_x\text{Se}_3$  ( $x=0.05, 0.10$ ) samples: (a) prepared by one-step HPCS, (b) prepared by HPCS-SPS.

The lattice thermal conductivities are calculated according to the Wiedemann-Franz Law ( $\kappa = \kappa_e + \kappa_L = L_0 \sigma T + \kappa_L$ ), where  $\kappa_e$  is the thermal conductivity contributed by carriers,  $L_0$  is the Lorentz number,  $\sigma$  is the electrical conductivity, and  $T$  is the absolute temperature. In our calculation, the Lorentz number of  $L_0 = 2.0 \times 10^{-8} \text{ W}\Omega\text{K}^{-2}$  is used according to the report by Shi et al. (X. Shi, L. Xi, J. Fan, W. Zhang and L. Chen, Chemistry of Materials, 2010, 22, 6029-6031.)
